# Supplementary material for: Novel cold temperature active β-glucosidase from Pseudomonas lutea BG8 suitable for simultaneous saccharification and fermentation
Source: Royal Society of Chemistry journal article supplement (doi:10.1039/c4ra09784j), 2014-10-30
Supplement: c4ra09784j1.pdf [file c4ra09784j1.pdf]

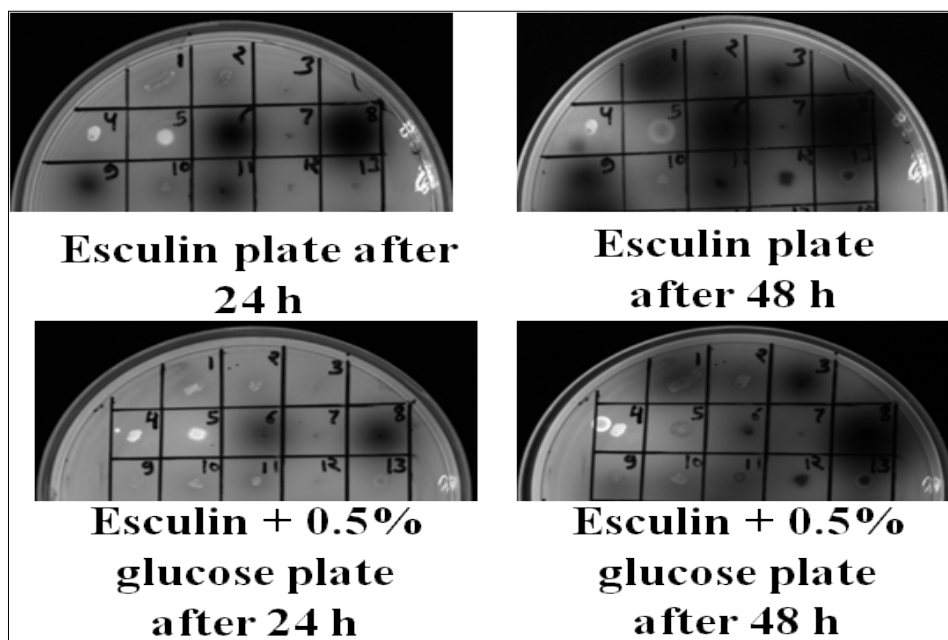

ESI Fig.1. Qualitative screening of  $\beta$ -glucosidase activity on agar medium containing esculin with or without glucose

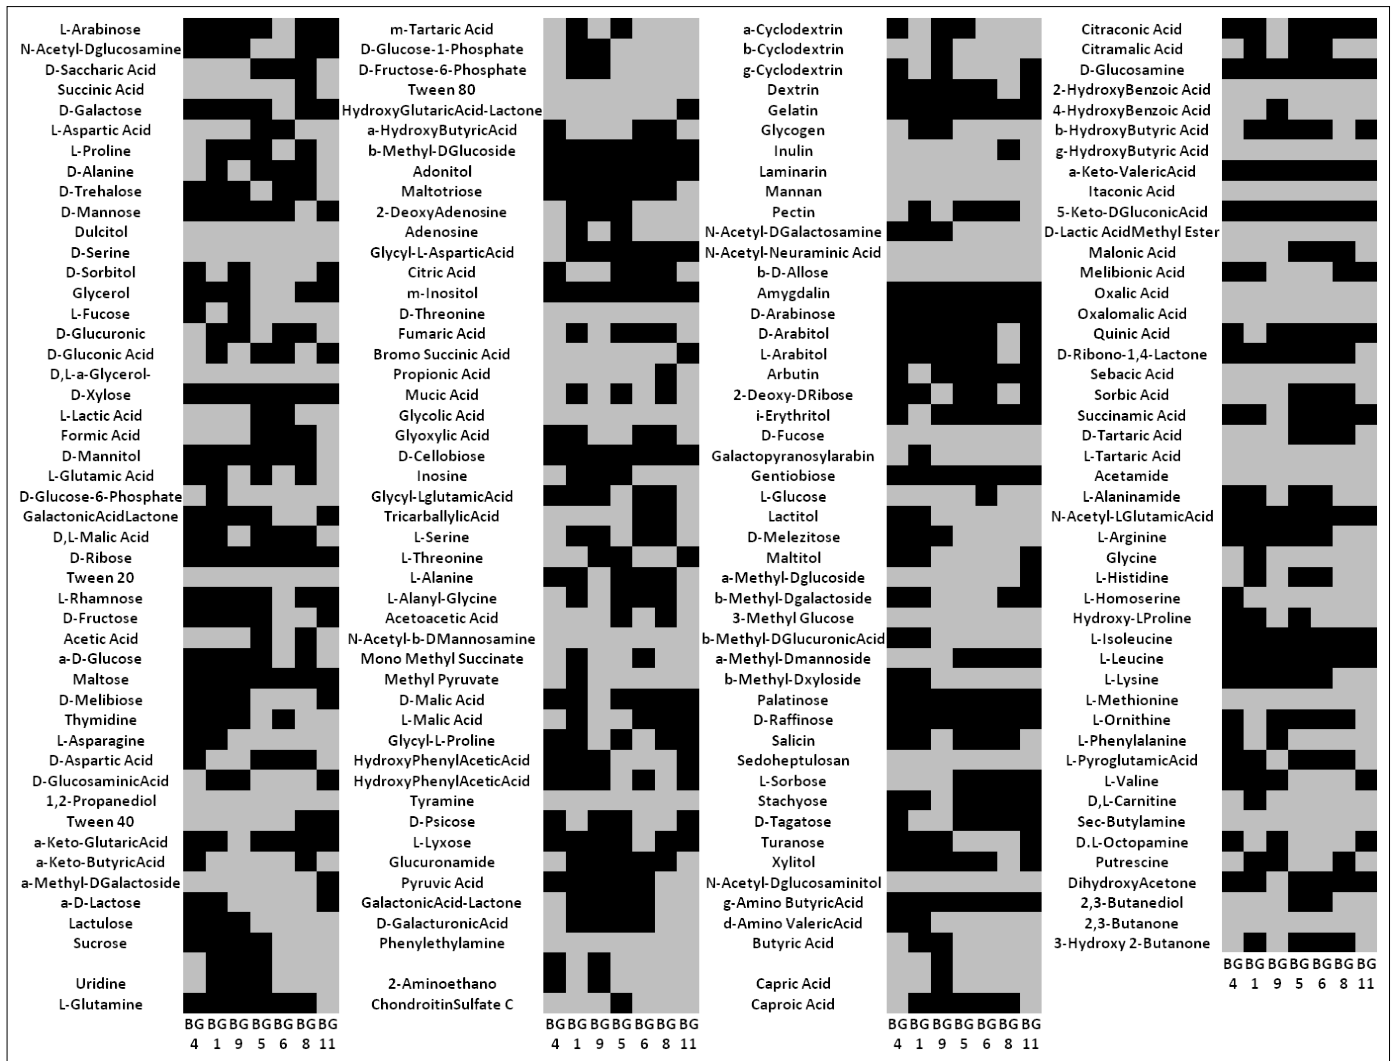

ESI Fig.2. Carbon source usage of selected isolates via BIOLOG PM assays plates. Black and gray boxes represent usage or no usage of carbon substrate, respectively
